# Supplementary material for: Differential dysregulation of granule subsets in WASH-deficient neutrophil leukocytes resulting in inflammation
Source: PubMed Central journal article supplement (PMC9492659; doi:10.1038/s41467-022-33230-y), 2022-09-21
Supplement: 41467_2022_33230_MOESM2_ESM.pdf [file 41467_2022_33230_MOESM2_ESM.pdf]

## Description of Additional Supplementary Files

File Name: Supplementary Data 1

Description: **Related to Table 1**

Supplementary Data wild type neutrophil secretome proteomics

File Name: Supplementary Data 2

Description: **Related to Table 1**

Supplementary Data Wash-KO neutrophil secretome proteomics

File Name: Supplementary Movie 1

Description: **TIRF microscopy analysis of azurophilic granule docking in WT neutrophils**

WT neutrophils were transfected with EGFP-LAMP3 by nucleofection and analyzed by TIRFM. The video was recorded for 150 seconds, 150 frames. Playback is 10 fps.

File Name: Supplementary Movie 2

Description: **TIRF microscopy analysis of azurophilic granule docking in *Wash*-cKO neutrophils**

*Wash*-cKO neutrophils were transfected with EGFP-LAMP3 by nucleofection and analyzed by TIRFM. The video was recorded for 150 seconds, 150 frames. Playback is 10 fps.

File Name: Supplementary Movie 3

Description: **TIRF microscopy analysis of actin remodeling in WT neutrophils**

WT neutrophils were transfected with YFP-actin by nucleofection and analyzed by TIRFM. The video was recorded for 60 seconds, 60 frames and 300 ms exposure. Playback is 7 fps.

File Name: Supplementary Movie 4

Description: **TIRF microscopy analysis of actin remodeling in *Wash*-cKO neutrophils**

*Wash*-cKO neutrophils were transfected with YFP-actin by nucleofection and analyzed by TIRFM. The video was recorded for 60 seconds, 60 frames and 300 ms exposure. Playback is 7 fps.
